# Supplementary material for: Analysis of properties of the 19 February 2018 volcanic eruption of Mount Sinabung in S5P/TROPOMI and Himawari-8 satellite data
Source: Copernicus journal article supplement (doi:10.5194/nhess-20-1203-2020), 2020-05-04
Supplement: Supplementary file 1 [file nhess-20-1203-2020-supplement.pdf]

Supplement of Nat. Hazards Earth Syst. Sci., 20, 1203–1217, 2020  
<https://doi.org/10.5194/nhess-20-1203-2020-supplement>  
© Author(s) 2020. This work is distributed under  
the Creative Commons Attribution 4.0 License.

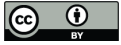

*Supplement of*

## **Analysis of properties of the 19 February 2018 volcanic eruption of Mount Sinabung in S5P/TROPOMI and Himawari-8 satellite data**

**Adrianus de Laat et al.**

*Correspondence to:* Adrianus de Laat ([laatdej@knmi.nl](mailto:laatdej@knmi.nl))

The copyright of individual parts of the supplement might differ from the CC BY 4.0 License.

IR Window Imagery and Ash/Dust Cloud Height

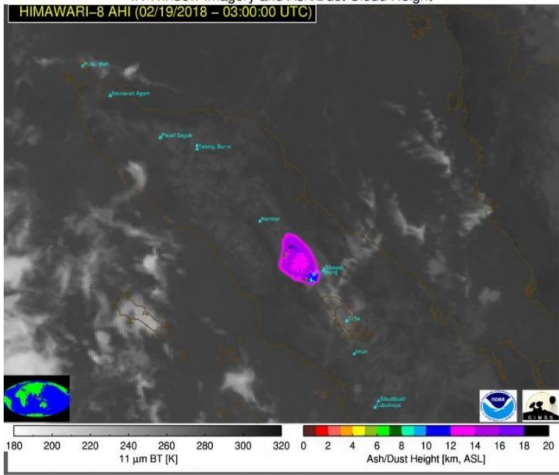

IR Window Imagery and Ash/Dust Cloud Height

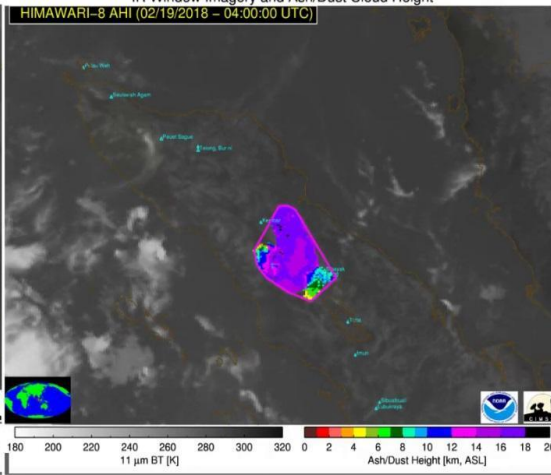

IR Window Imagery and Ash/Dust Cloud Height

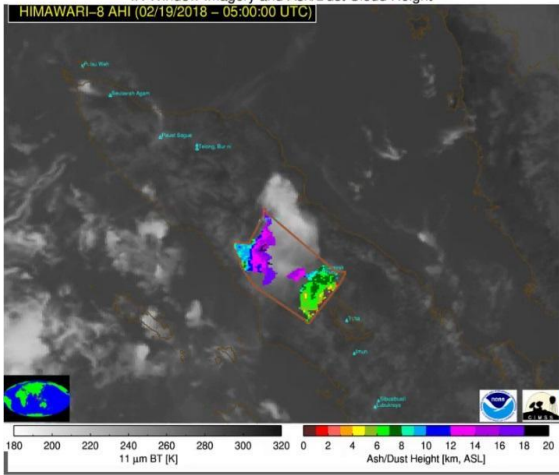

IR Window Imagery and Ash/Dust Cloud Height

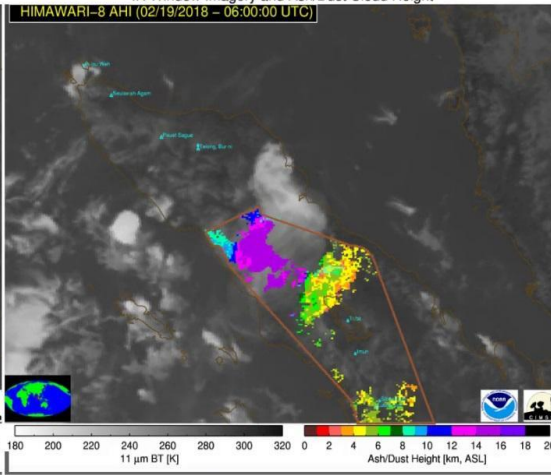

IR Window Imagery and Ash/Dust Cloud Height

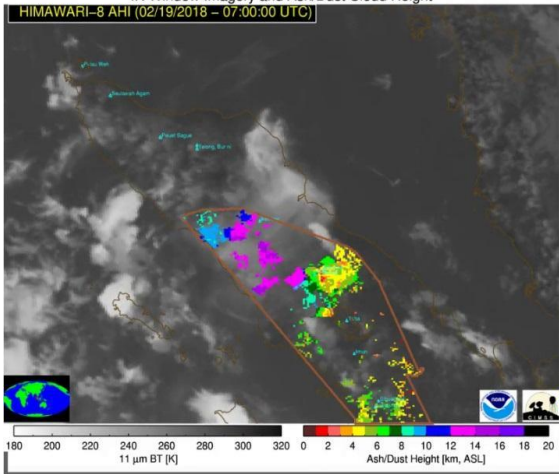

IR Window Imagery and Ash/Dust Cloud Height

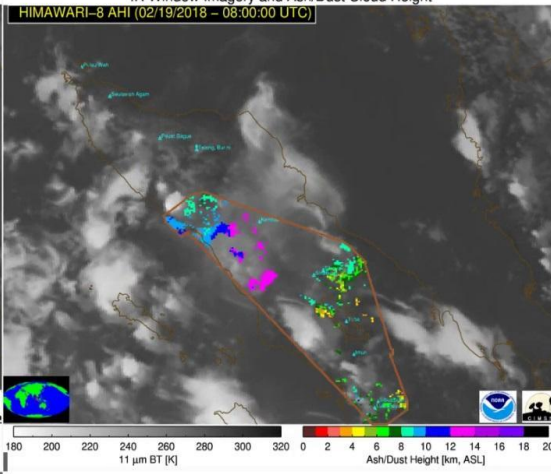

**Figure S1.** Hourly HIMAWARI-based brightness temperatures (11  $\mu\text{m}$ ) and ash/dust heights on 19 February 2018 over Sumatra between 03:00-08:00 UTC. Ash dust heights from NOAA/CIMSS, imagery obtained from the NOAA/CIMSS  
10 Volcanic Cloud Monitoring Web Portal (<https://volcano.ssec.wisc.edu/>). The brownish outline is an automatically generated contour.

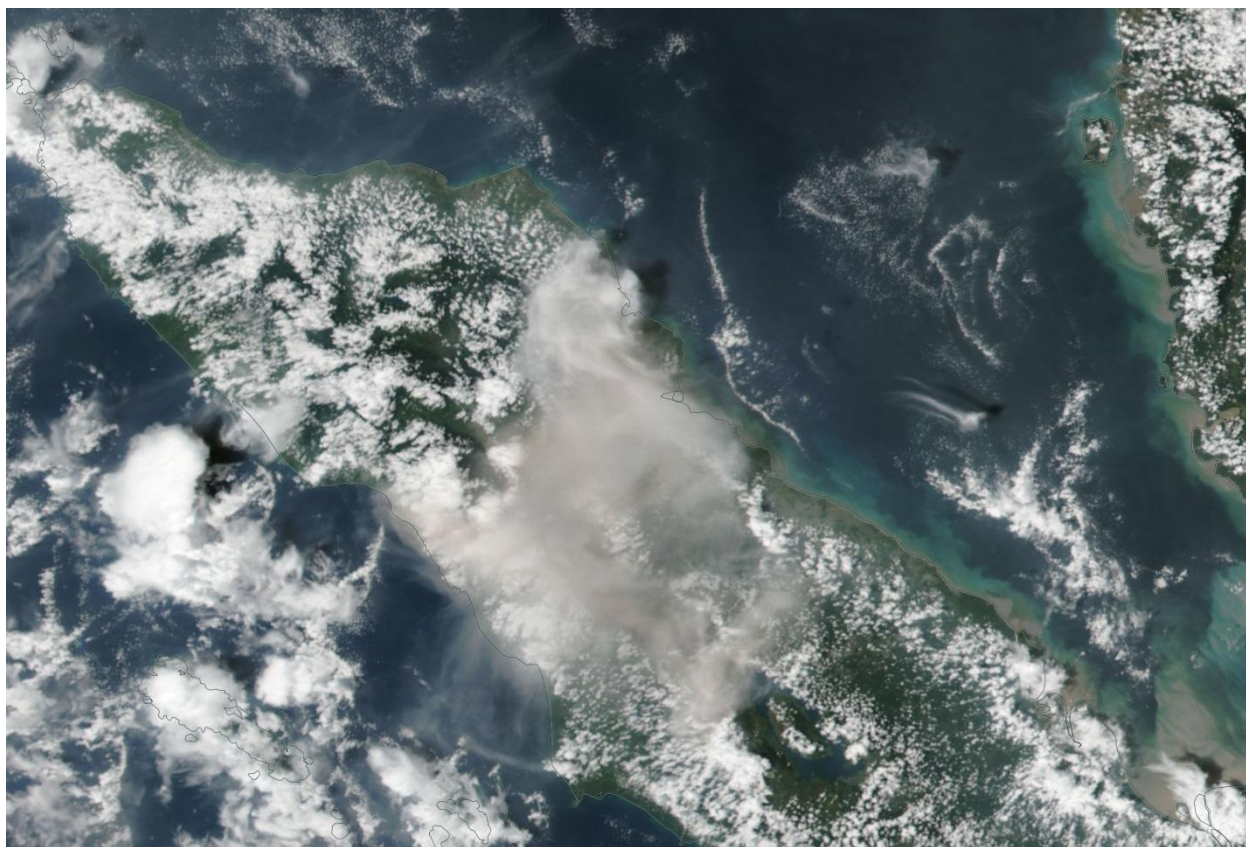

**Figure S2a.** MODIS-Terra pseudo visible color images on 19 February 2018 over northern Sumatra, approximately 10:30  
15 local time. Image obtained from <https://worldview.earthdata.nasa.gov/>.

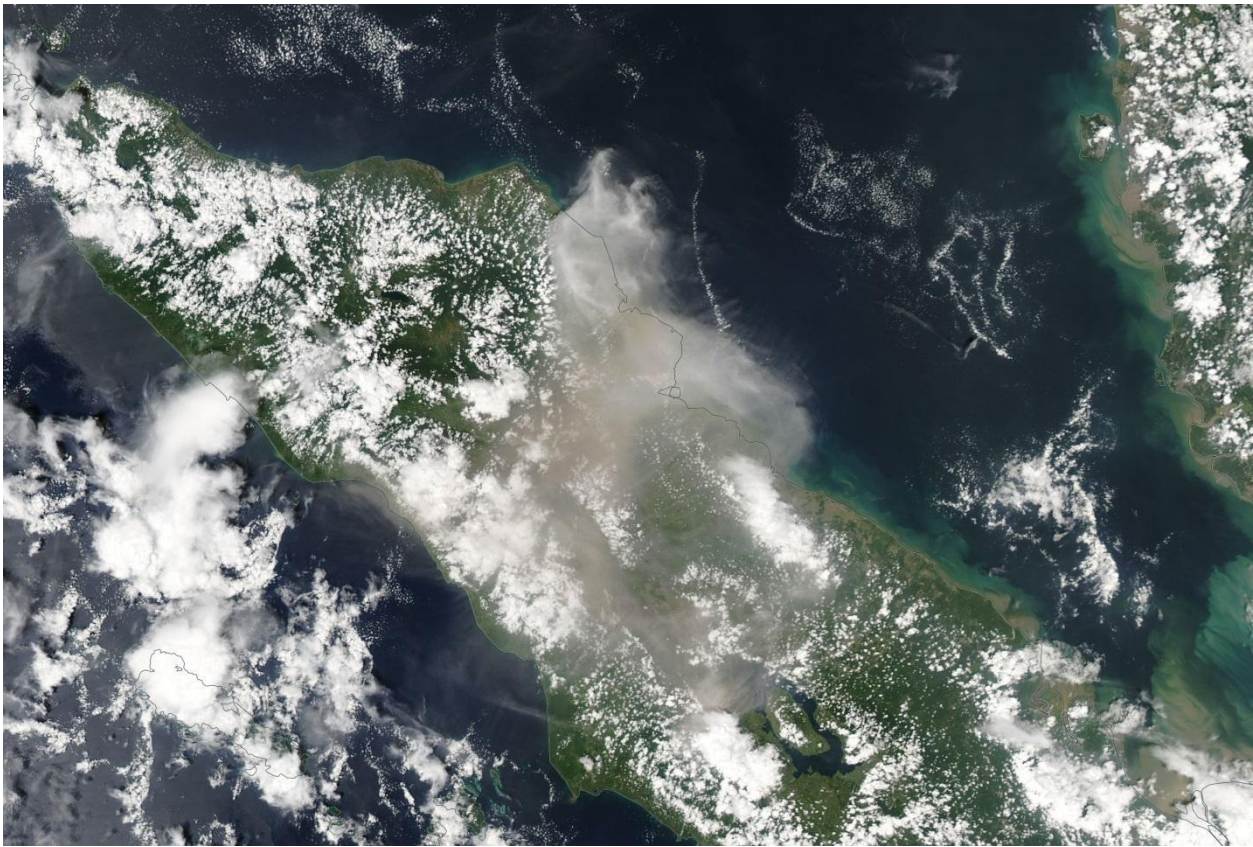

**Figure S2b.** As figure S2a but for the VIIRS satellite instrument and at approximately 13:30 local time. Image obtained from <https://worldview.earthdata.nasa.gov/>.
